# Supplementary material
Source: publisher figshare collection journal article supplement (https://tandf.figshare.com/ndownloader/files/8918077)
Supplement: Supplementary file 1 [file 8918077]

## SUPPLEMENTARY MATERIAL

### **Evaluation of Resazurin Microtiter Plate Assay and HPLC- Photodiode Array Analysis of the Roots of *Asparagus adscendens***

Kashif Maqbool Khan,<sup>1,2</sup> Lutfun Nahar,<sup>1</sup> Abdul Mannan<sup>2</sup>, Muhammad Arfan<sup>3</sup>, Ghazanfar Ali Khan<sup>4</sup>, Glyn Hobbs<sup>1</sup> and Satyajit D. Sarker<sup>1\*\*</sup>

<sup>1</sup>*Medicinal Chemistry and Natural Products Research Group, School of Pharmacy and Biomolecular Sciences, Faculty of Science, Liverpool John Moores University, James Parsons Building, Byrom Street, Liverpool L3 3AF, England, UK*

<sup>2</sup>*Department of Pharmacy, COMSATS Institute of Information Technology, Abbottabad 22060, Pakistan*

<sup>3</sup>*Department of Chemistry, School of Natural Sciences, National University of Science and Technology, Islamabad 46000, Pakistan*

<sup>4</sup>*Drug Regulatory Authority, 7-Mauve Area, G-9/4, Islamabad, 44000 Pakistan*

\*Correspondence to: E-mail: kashifmkhan007@gmail.com (Kashif M. Khan) Tel: +92-3334384432, Fax No. +92-992-383441

\*\*Co-Correspondence to: E-mail: S.Sarker@ljmu.ac.uk (Satyajit D. Sarker) Tel: +44- 151-2312096

## **Abstract**

*Asparagus adscendens* Roxb. (Asparagaceae), is native to the Himalayas. The present study, for the first time, was undertaken to explore the antimicrobial potential, to determine the minimum inhibitory concentration (MIC) values of the methanol extract of the roots of *Asparagus adscendens* and its solid phase extraction (SPE) fractions by using resazurin microtiter assay (REMA) against gram positive and negative bacterial registered strains and to carry out HPLC-Photodiode array analysis of the SPE fractions. The methanol extract and all SPE exhibited considerable level of antibacterial potential against gram-positive bacteria (MIC: 2.5-0.009 mg/mL) than against gram-negative bacteria (MIC: 1.25-2.5 mg/mL). The use of microtiter plates has the advantage of lower cost, fast and quantitative results. Like other *Asparagus* species, the presence of phenolic compounds in all SPE fractions was evident in the HPLC-PDA data.

**Keywords:** *Asparagus adscendens*; Asparagaceae; SPE; REMA; MIC; HPLC-PDA

## **Experimental**

### ***Reagents and chemicals***

Unless otherwise stated all chemicals were purchased from Sigma-Aldrich (Dorset, UK). Solvents were purchased from Fisher Scientific (Loughborough, UK); sterile resazurin tablets (Fischer Chemicals); UV spectrophotometer (Shimadzu); HPLC Agilent 1260 Infinity; Incubator (Binder) at 35 and 37 °C; vortex mixer (Labnet International); Eppendorf Centrifuge 5810 R (Fischer Scientific, UK); Shaker Incubator (Sartorius CERTOMAT); Four NCTC and One ACTC registered bacterial strains were obtained from the Microbiology labs of School of Pharmacy and Biomolecular Sciences, Liverpool John Moores University.

***Plant materials.*** Plant sample was collected from Muzaffarabad district of Pakistan-controlled Azad Kashmir and identified as *Asparagus adscendens* Roxb. by Dr Muhammad Zafar, Herbarium Botanist, Department of Plant Sciences, Quaid-I-Azam University, Islamabad, Pakistan. A herbarium specimen for this collection (voucher number: Acc no. PAC1001) has been deposited and retained in the above herbarium.

***Extraction and preparation of plant samples.*** Shade-dried and finely ground roots (2.5 kg) of *Asparagus adscendens* were macerated in MeOH (5 L) for 10 days at room temperature, filtered, and the solvent was evaporated under vacuum using a rotatory evaporator (<45°C) to obtain concentrated gummy crude extract.

***Solid-phase extraction (SPE) and sample purification.*** A portion of the dried MeOH extract (2 g) was suspended in 20 mL of HPLC grade water and loaded on to a Strata C-18 cartridge (20 g), previously washed with MeOH (50 mL) followed by equilibration with water (100 mL). The cartridge was eluted with MeOH-water mixture of decreasing polarity to obtain

four fractions: 20, 50, 80 and 100% MeOH in water (250 mL each), coded respectively as AAMF1, AAMF2, AAMF3 and AAMF4. All four fractions were evaporated to dryness using a combination of rotary evaporator and freeze-dryer, re-dissolved in MeOH (10 mg/mL), centrifuged at 12,000 rpm for 3 min, filtered through 0.20 µm sterile syringe filter for injection (10 µL) into the HPLC-PDA system.

#### ***High Performance Liquid Chromatography –Photodiode array detection (HPLC-PDA)***

An analytical Agilent 1260 Infinity was used. Reversed-phase chromatography was performed on a Phenomenex Gemini-NX 5 U C<sub>18</sub> column (250 x 4.6 mm). The column temperature was set at 25°C. A variable wavelength UV-Vis detector was set at 220 nm, 254nm and 360nm. An elution gradient was used with solvent A (1% trifluoroacetic acid in water) and solvent B (1% trifluoroacetic acid in MeOH). The initial mobile phase composition was 70% of A and 30% B at 0 min, then linear gradient to 100% of B over 30 min and held at that composition for 5 min before to returning to start conditions and column equilibration at flow rate of 0.800 mL/min. The chromatograms were monitored as 220 nm, 254 nm and 360 nm.

#### ***Minimum inhibitory concentration (MIC) determination***

The *in vitro* susceptibility testing was performed using a 96-well microtiter plate with resazurin. A stock solution of antibiotics was prepared at a concentration of 128 µg/ml by dissolving in sterile distilled water. Plant extracts were prepared with 10% DMSO to obtain a stock concentration of 10 mg/ml (Sarker *et al.*, 2007). Sterile Distilled water was used to dissolve resazurin dye to obtain 0.02 % and the solution was then sterilized by filtration. The MIC assay was carried out in according to CLSI guideline for microdilution test (Clinical Laboratory Standards Institute, 2012). Briefly, the stock antibiotics and plant extracts were serially two fold diluted with cation-adjusted Mueller hinton broth (CAMHB). The additional

60  $\mu\text{L}$  of the CAMHB and 20  $\mu\text{L}$  of 0.02% resazurin were added to all wells. An Overnight culture of test bacteria was harvested by centrifugation at 4,000 rpm for 10 min, washed twice with NaCl by centrifugation at 4,000 rpm for 5 min each. The pellet collected was then adjusted approximately 0.5 standard McFarland equivalent (  $1 \times 10^8$  CFU/mL), diluted to give  $5 \times 10^6$  CFU/mL, and then 20  $\mu\text{L}$  will be transferred to the well so that the final concentration of inoculum is approximately  $5 \times 10^5$  CFU/mL. The total volume in each well was 200  $\mu\text{L}$  and the final concentration of antibiotics and the extracts were 0.06-64  $\mu\text{g/mL}$  and 0.005-5 mg/mL, respectively. Wells without antibacterial agents and bacterial strain were used as controls. The 96-well microplate was then incubated at 37 °C for 24 h. The lowest concentration showing no colorimetric change from blue (resazurin) to pink (resorufin) was noted as the MIC. Each test was carried out in triplicate. The average values were calculated for the MIC of test material.

***Statistical analysis.*** The data were expressed as mean values  $\pm$  standard error of the mean (SEM) of three parallel replicates. The graph was plotted using non-linear regression with the use of Microsoft Excel version 2013. The means were separated at confidence level  $p \leq 0.05$  by using analysis of variance (ANOVA) with Tukey's range test.

## **Results**

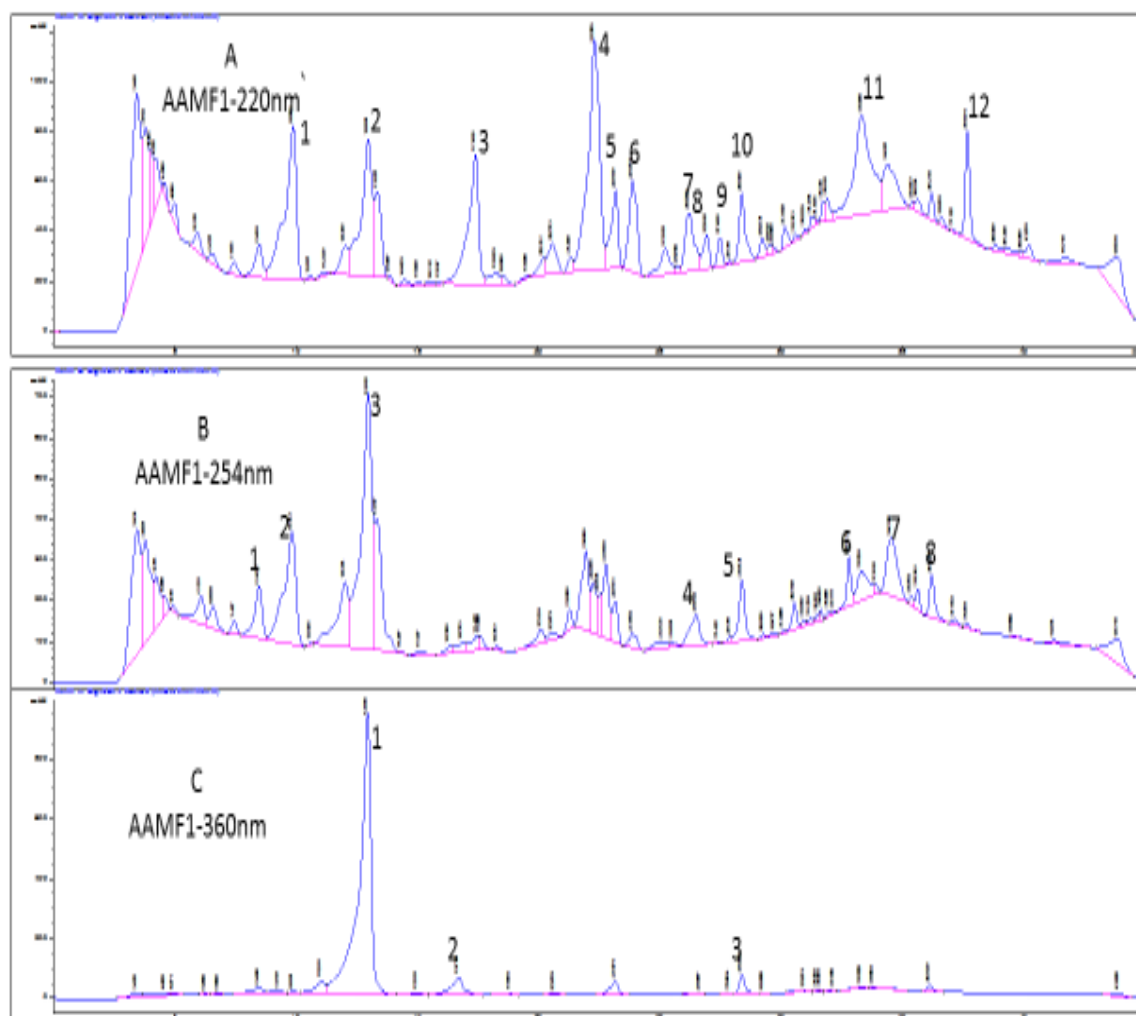

**Figure S1:** HPLC-PDA Chromatogram of AAMF1 of *Asparagus adscendens* extract (A) monitored at 220nm, (B) monitored at 254nm and (C) monitored at 360nm.

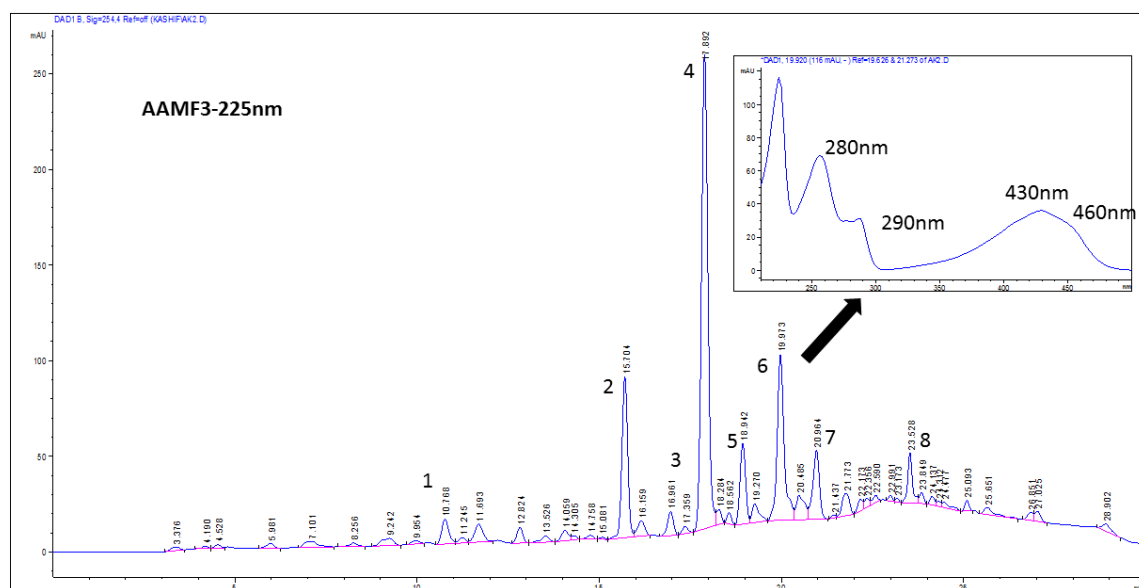

**Figure S2.** HPLC-PDA Chromatogram of AAMF3 of *Asparagus adscendens* extract monitored at 254nm.

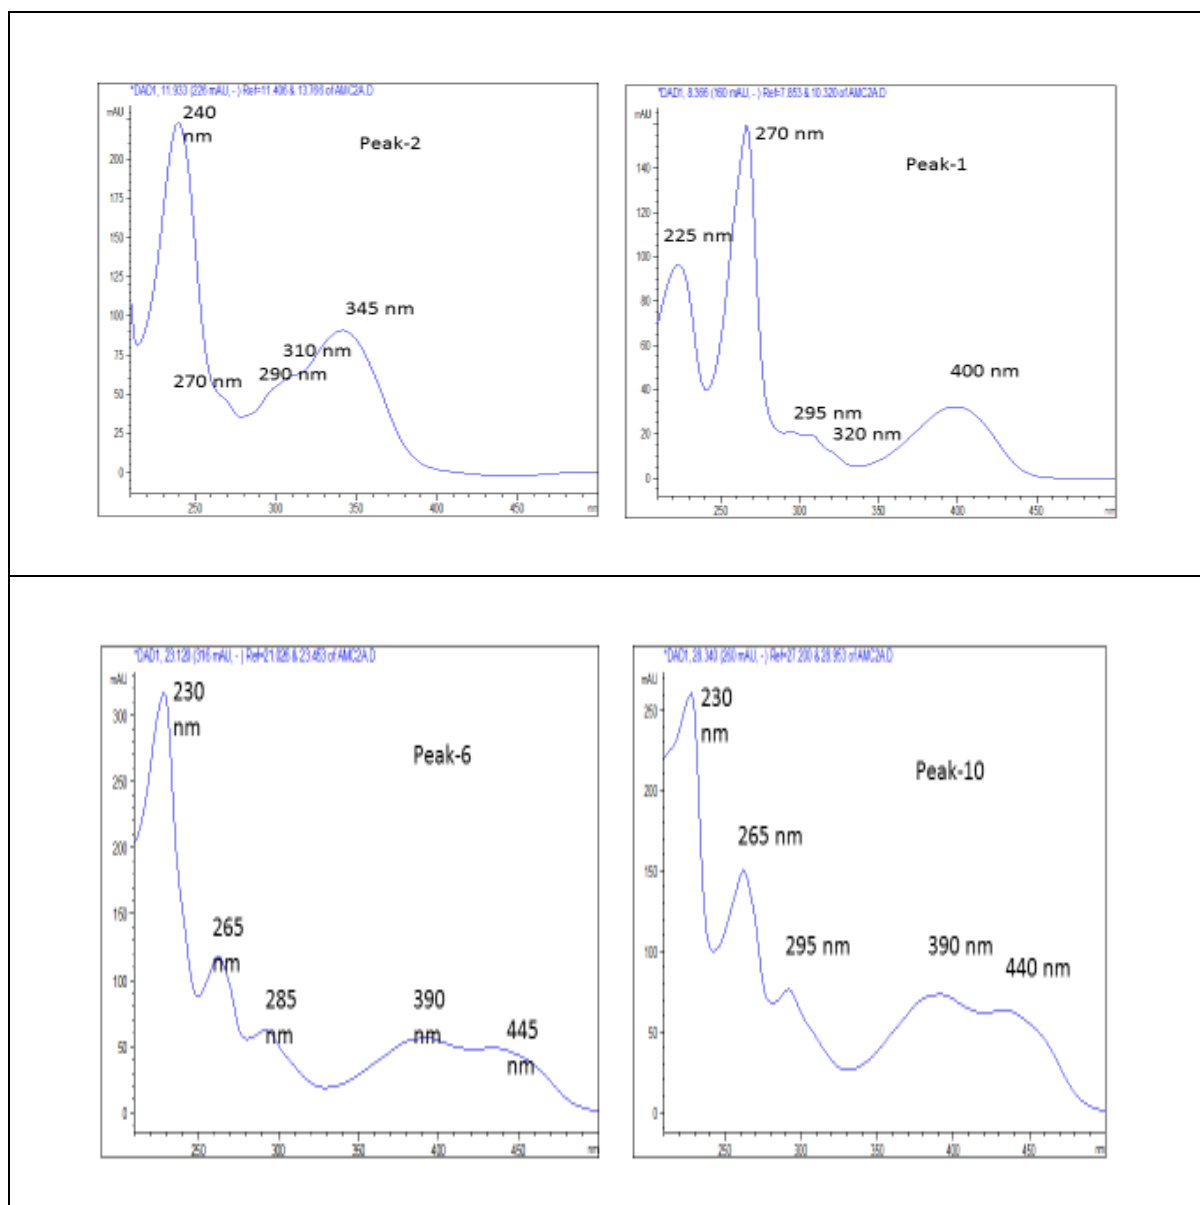

**Figure S3:** Corresponding UV-vis absorbance (AAMF1) at multiple wavelengths of the peaks separated by HPLC



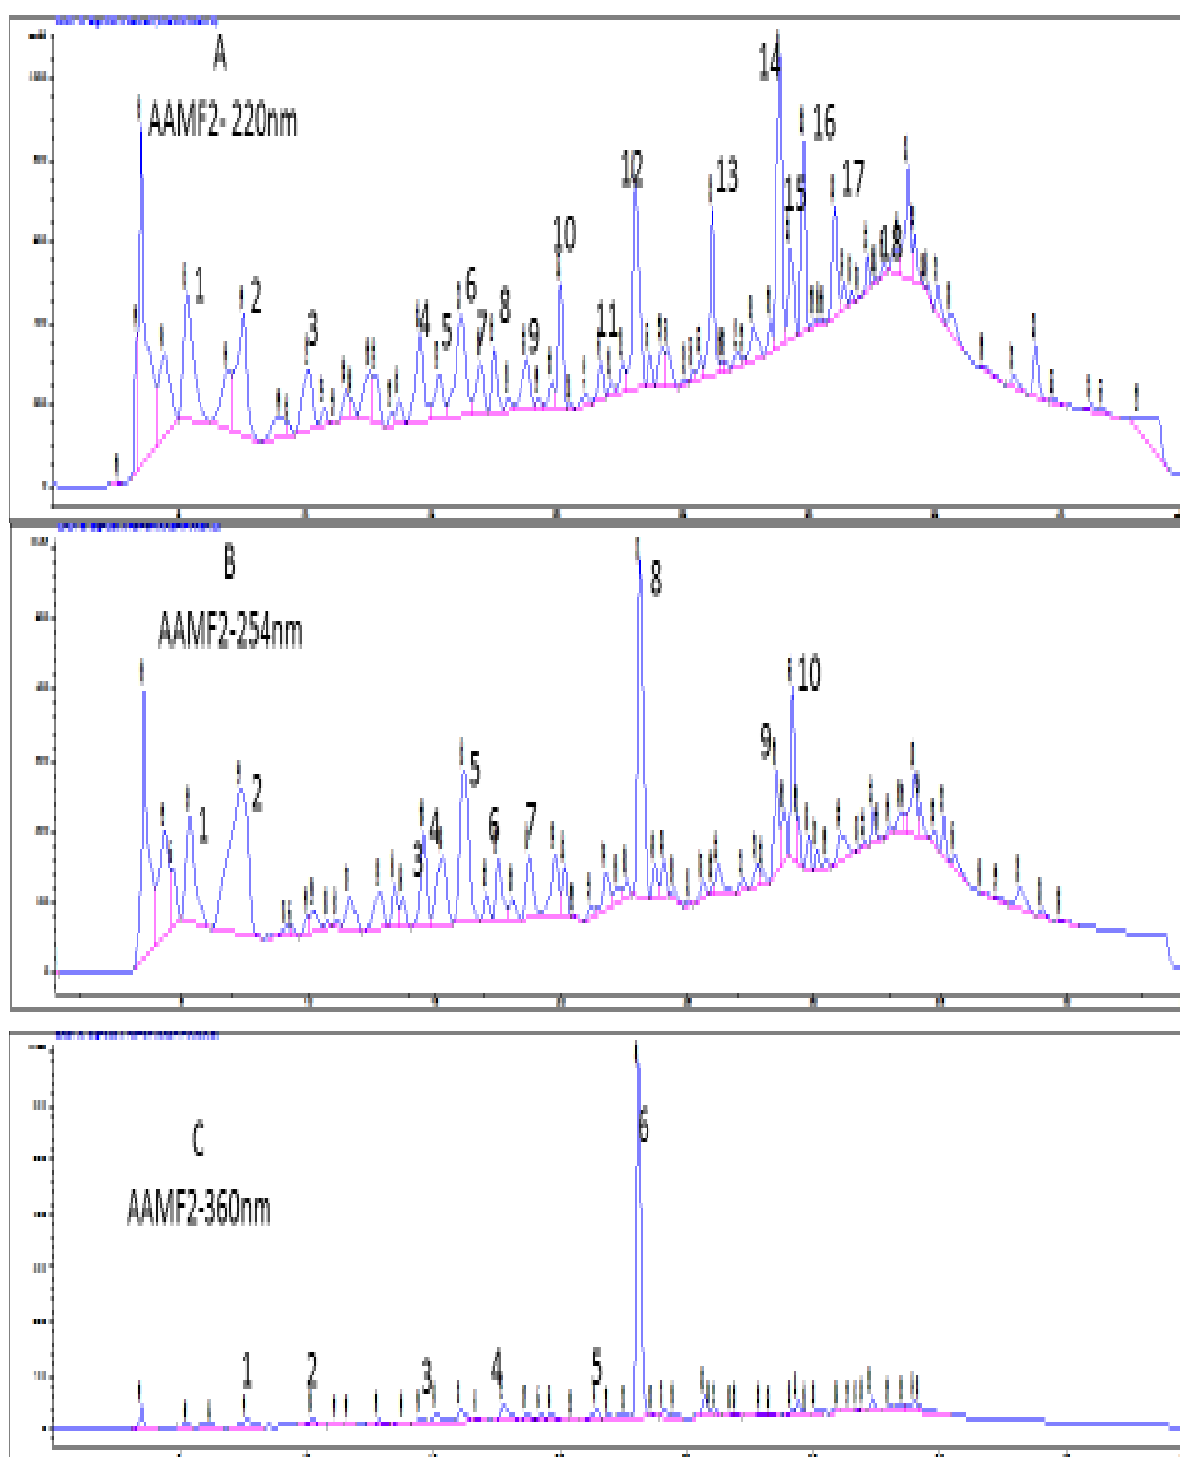

**Figure S4:** HPLC-PDA Chromatogram of AAMF2 of *Asparagus adscendens* extract (A) monitored at 220nm, (B) monitored at 254nm and (C) monitored at 360nm.

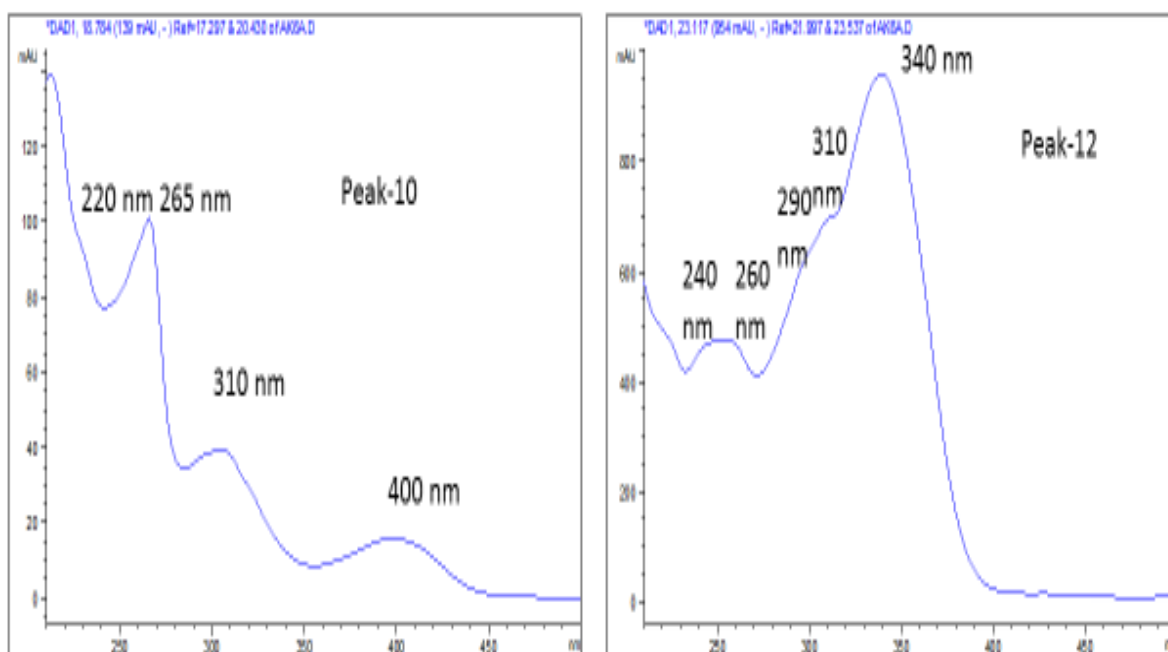

**Figure S5:** Corresponding UV-vis absorbance (AAMF2) at multiple wavelengths of the peaks separated by HPLC-PDA

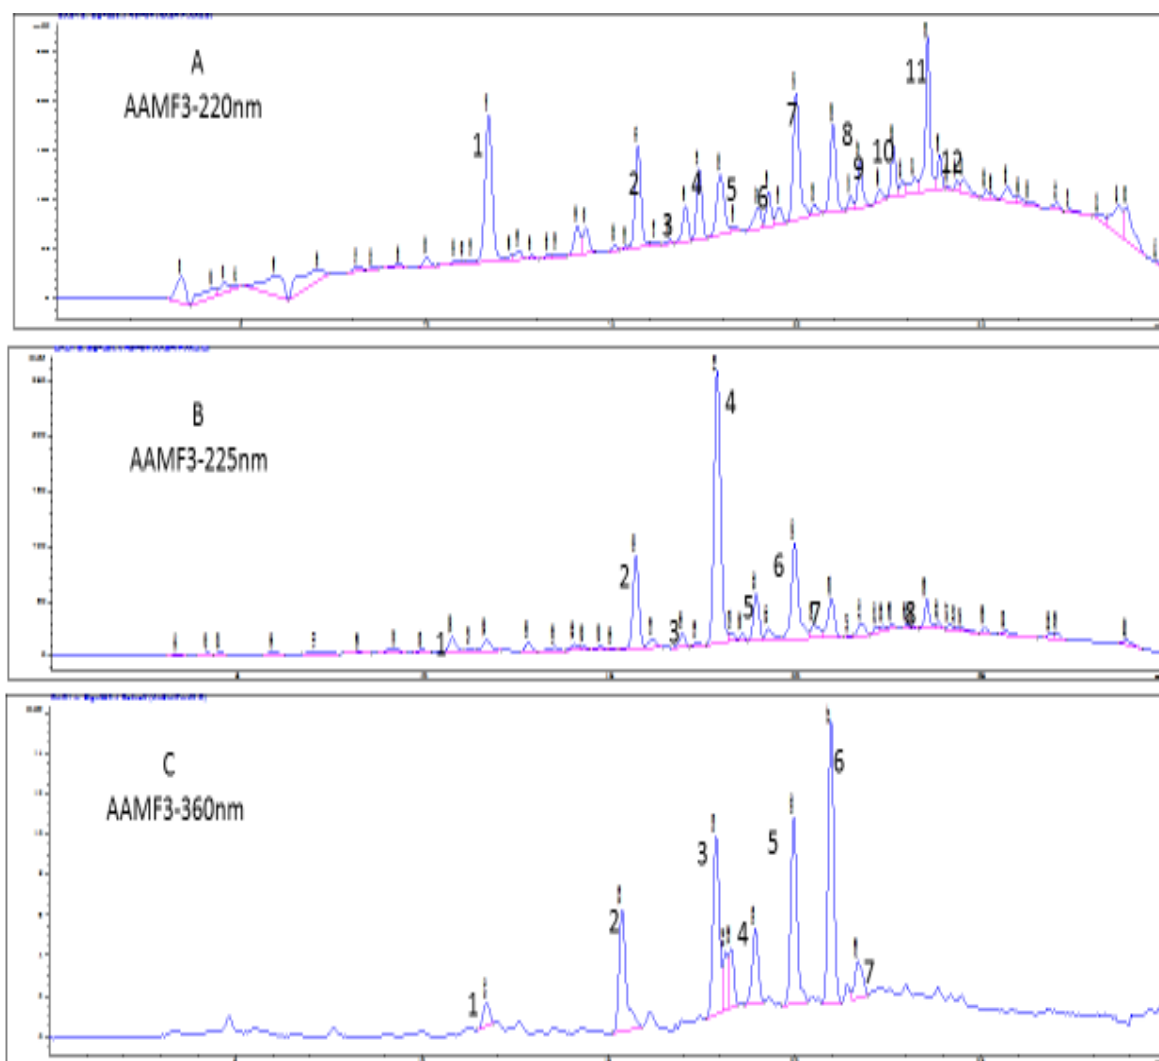

**Figure S6:** HPLC-PDA Chromatogram of AAMF3 of *Asparagus adscendens* extract (A) monitored at 220nm, (B) monitored at 254nm and (C) monitored at 360nm.

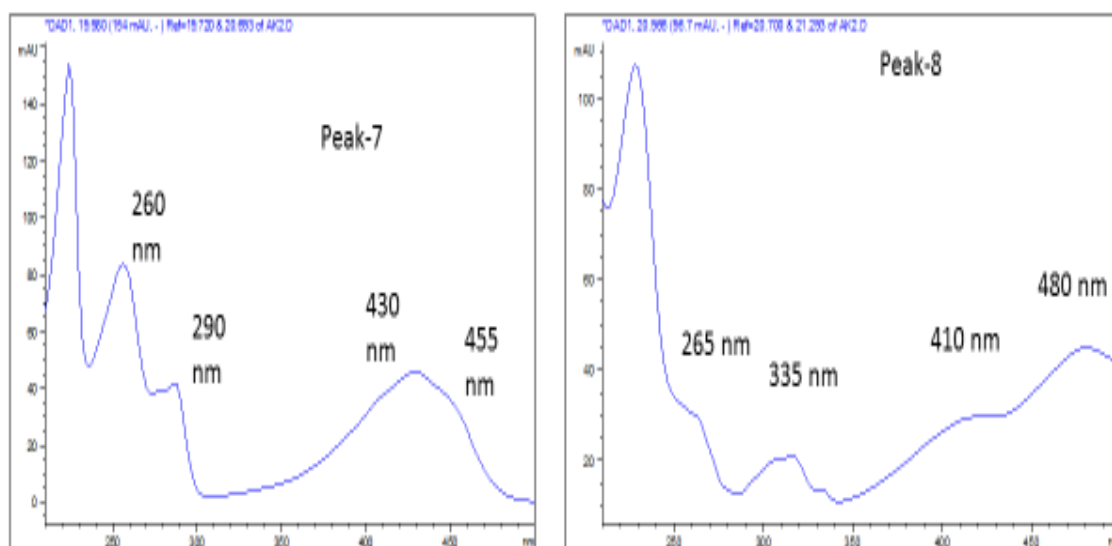

**Figure S7:** Corresponding UV-vis absorbance (AAMF3) at multiple wavelengths of the peaks separated by HPLC-PDA

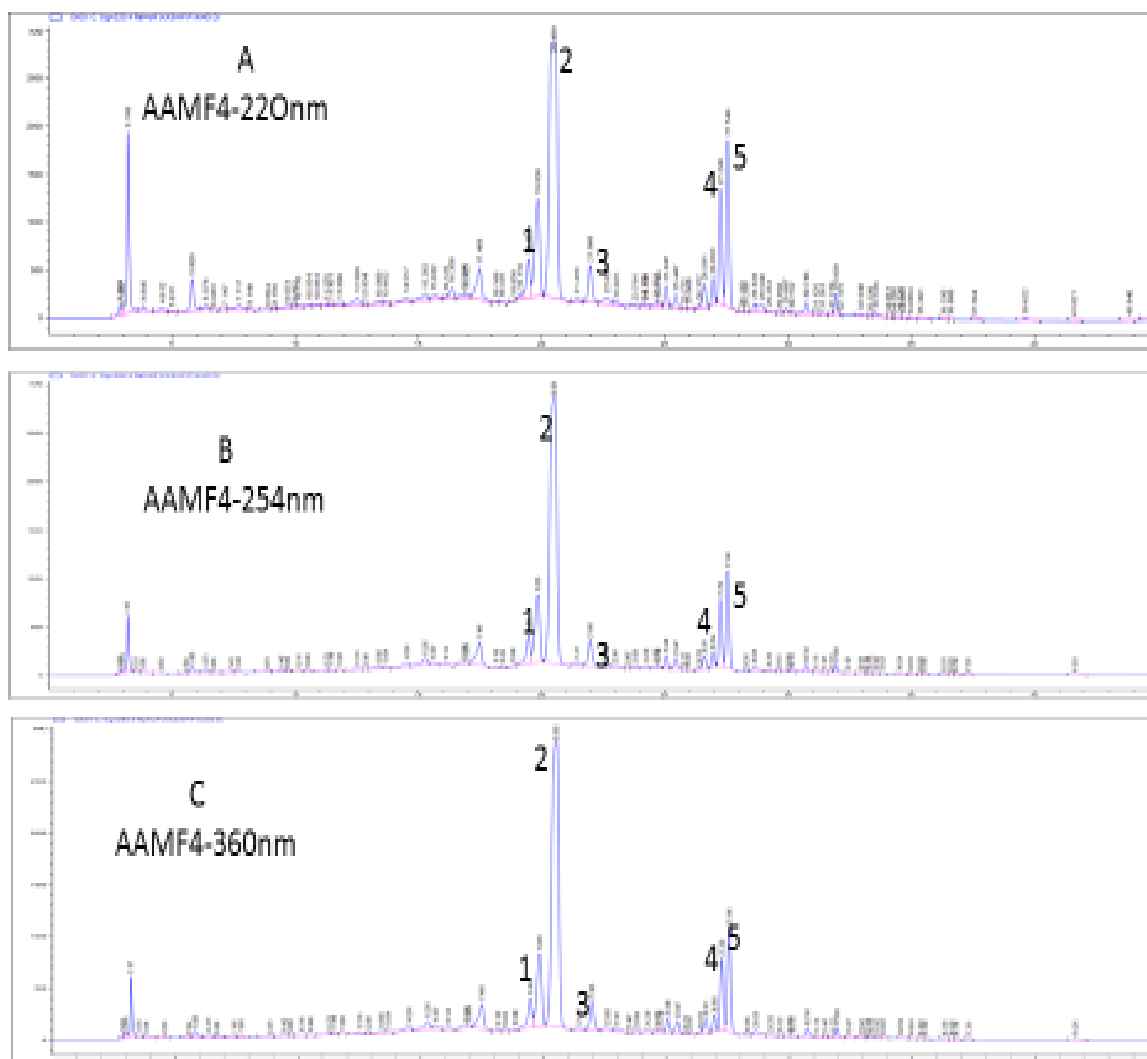

**Figure S8:** HPLC-PDA Chromatogram of AAMF4 of *Asparagus adscendens* extract (A) monitored at 220nm, (B) monitored at 254nm and (C) monitored at 360nm.

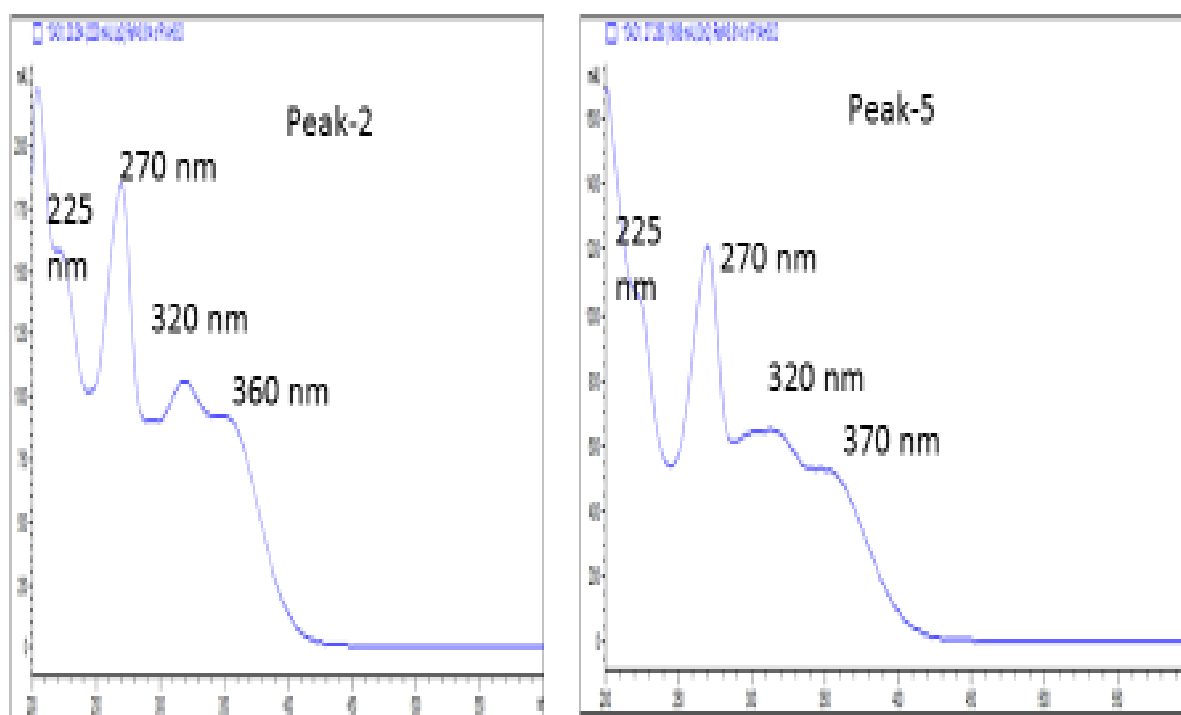

**Figure S9:** Corresponding UV-vis absorbance (AAMF4) at multiple wavelengths of the peaks separated by HPLC-PDA.

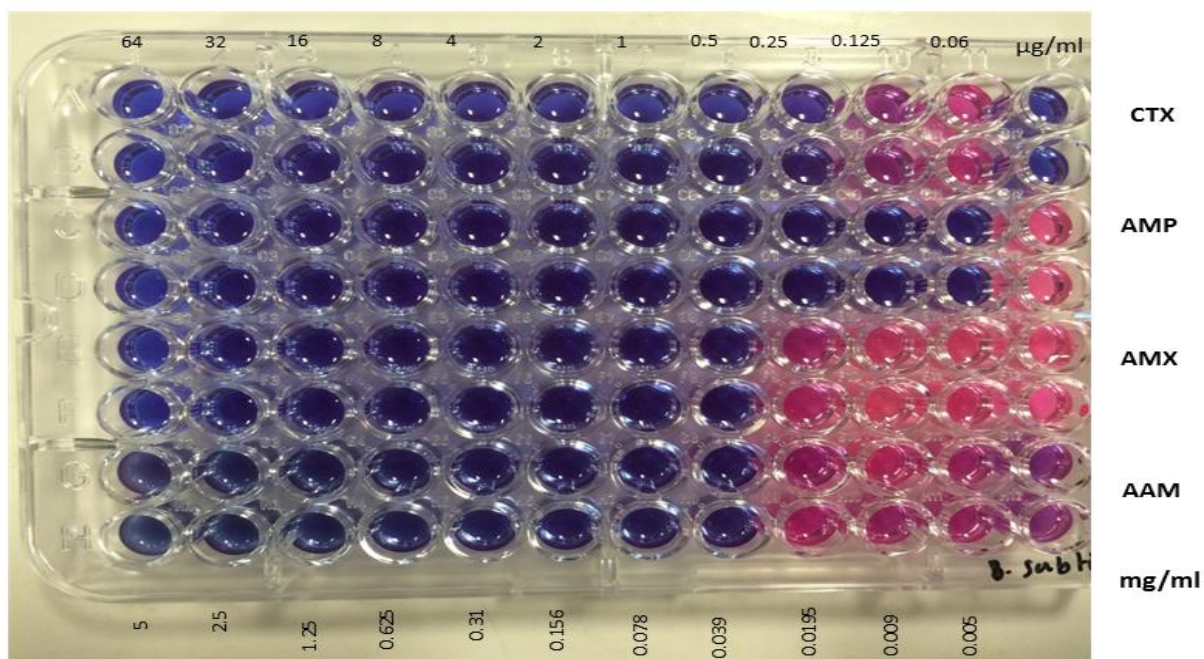

**Figure S10:** Typical Plate after 24 h in resazurin assay [final concentration of antibiotics and the extracts were 0.06-64  $\mu\text{g/ml}$  and 0.005-5  $\text{mg/ml}$ , respectively; lowest concentration showing no colorimetric change from blue (resazurin) to pink (resorufin) was noted as the MIC; the test organism was *Bacillus subtilis* 1604; CTX (Cefotaxime), AMP (Ampicillin), AMX (Amoxicillin), AAM (*Asparagus adscendens* methanol extract)].

**Table S1.** The MIC (mg/mL) values of the MeOH extract of the roots of *A. adscendens* and its SPE fractions by using the resazurin assay

| Test             |         | Bacterial strains |        |       |       |       |
|------------------|---------|-------------------|--------|-------|-------|-------|
| compounds        |         | SA                | BS     | ML    | EC    | KO    |
| AAM <sup>a</sup> | (mg/mL) | 2.5               | 0.039  | 0.31  | 2.5   | 1.25  |
| AAMF1            | (mg/mL) | 2.5               | 2.5    | 0.078 | 2.5   | 2.5   |
| AAMF2            | (mg/mL) | 1.25              | 0.31   | 0.31  | 2.5   | 2.5   |
| AAMF3            | (mg/mL) | 0.625             | 0.0195 | 0.078 | 2.5   | 1.25  |
| AAMF4            | (mg/mL) | 0.156             | 0.009  | 0.156 | ≥10   | ≥10   |
| CTX <sup>b</sup> | (μg/mL) | 2                 | 0.25   | 0.25  | ≤0.06 | ≤0.06 |
| AMP <sup>c</sup> | (μg/mL) | 0.125             | ≤0.06  | 0.125 | 4     | 2     |
| AMX <sup>d</sup> | (μg/mL) | 4                 | 0.5    | 4     | 2     | 2     |

SA, *Staphylococcus aureus* NCTC 7508; BS, *Bacillus subtilis* NCTC 1604; ML, *M. luteus* NCTC 7508; EC, *Escherichia coli* ATCC 25922; KO, *K. oxytoca* NCTC 8017; AAM<sup>a</sup> (*Asparagus adscendens* methanol extract), CTX<sup>b</sup> (Cefotaxime), AMP<sup>c</sup> (Ampicillin), AMX<sup>d</sup> (Amoxicillin)



**Table S2.** Retention times ( $t_R$ ) and corresponding UV-vis absorbance at multiple wavelengths of the peaks separated by HPLC of SPE fractions of the MeOH extract of the roots of *Asparagus adscendens*

| AMF1            |                | 220nm |     |     |     |     |                | 254nm          |     |     |     |     |  | 360nm          |                |     |     |     |     |
|-----------------|----------------|-------|-----|-----|-----|-----|----------------|----------------|-----|-----|-----|-----|--|----------------|----------------|-----|-----|-----|-----|
| Peaks           | $t_R$ in (min) |       |     |     |     |     | Peaks          | $t_R$ in (min) |     |     |     |     |  | Peaks          | $t_R$ in (min) |     |     |     |     |
| 1 <sup>a</sup>  | 8.36           | 225   | 270 | 295 | 320 | 400 | 1              | 7.47           | 220 | 280 |     |     |  | 1 <sup>a</sup> | 12.85          | 240 | 260 | 290 | 310 |
| 2 <sup>a</sup>  | 11.93          | 240   | 270 | 290 | 310 | 345 | 2 <sup>a</sup> | 8.42           | 225 | 270 | 320 | 400 |  | 2 <sup>a</sup> | 16.66          | 285 | 325 | 360 |     |
| 3               | 17.4           | 220   | 265 |     |     |     | 3 <sup>a</sup> | 12.91          | 260 | 295 | 310 | 340 |  | 3 <sup>a</sup> | 28.34          | 265 | 295 | 385 | 440 |
| 4               | 20.53          | 230   | 290 |     |     |     | 4              | 26.44          | 240 | 290 |     |     |  |                |                |     |     |     |     |
| 6 <sup>a</sup>  | 23.12          | 230   | 265 | 290 | 285 | 445 | 5 <sup>a</sup> | 28.34          | 265 | 290 | 390 | 440 |  |                |                |     |     |     |     |
| 10 <sup>a</sup> | 28.34          | 230   | 265 | 295 | 390 | 440 | 6              | 32.76          | 230 | 260 |     |     |  |                |                |     |     |     |     |
| 12              | 37.65          | 220   | 270 |     |     |     | 8 <sup>a</sup> | 36.21          | 295 | 375 | 390 | 440 |  |                |                |     |     |     |     |
| <b>AAMF2</b>    |                |       |     |     |     |     |                |                |     |     |     |     |  |                |                |     |     |     |     |
| 10 <sup>a</sup> | 18.78          | 220   | 230 | 265 | 310 | 400 | 2 <sup>a</sup> | 8.42           | 225 | 270 | 320 | 400 |  | 1 <sup>a</sup> | 12.85          | 240 | 260 | 290 | 310 |
| 12 <sup>a</sup> | 23.11          | 240   | 260 | 290 | 310 | 340 | 5 <sup>a</sup> | 28.3           | 265 | 290 | 390 | 440 |  | 2 <sup>a</sup> | 16.66          | 285 | 295 | 325 | 360 |
| 13              | 26.16          | 220   | 260 |     |     |     | 8 <sup>a</sup> | 36.2           | 295 | 375 | 390 | 440 |  | 3 <sup>a</sup> | 28.34          | 265 | 295 | 385 | 440 |
| 14              | 28.83          | 230   | 280 |     |     |     |                |                |     |     |     |     |  |                |                |     |     |     |     |
| <b>AAMF3</b>    |                |       |     |     |     |     |                |                |     |     |     |     |  |                |                |     |     |     |     |
| 1               | 11.68          | 225   | 275 |     |     |     | 2              | 15.72          | 220 | 245 |     |     |  | 2 <sup>a</sup> | 15.39          | 225 | 245 | 260 | 335 |
| 2               | 15.74          | 220   | 240 |     |     |     | 4              | 17.89          | 260 | 280 | 330 |     |  | 3 <sup>a</sup> | 17.91          | 260 | 280 | 320 |     |
| 7 <sup>a</sup>  | 19.95          | 260   | 290 | 430 | 455 |     | 6 <sup>a</sup> | 19.92          | 280 | 290 | 430 | 460 |  | 5 <sup>a</sup> | 19.92          | 255 | 290 | 430 | 460 |
| 8 <sup>a</sup>  | 20.96          | 265   | 335 | 410 | 480 |     | 7 <sup>a</sup> | 20.94          | 320 | 335 | 415 | 480 |  | 7              | 21.7           | 280 |     |     |     |
| <b>AAMF4</b>    |                |       |     |     |     |     |                |                |     |     |     |     |  |                |                |     |     |     |     |
| 2 <sup>a</sup>  | 20.29          | 225   | 270 | 295 | 320 | 360 | 2 <sup>a</sup> | 20.29          | 227 | 270 | 295 | 322 |  | 2 <sup>a</sup> | 20.29          | 226 | 270 | 324 | 370 |
| 5 <sup>a</sup>  | 27.28          | 225   | 270 | 320 | 370 |     | 5 <sup>a</sup> | 27.28          | 222 | 270 | 310 | 360 |  | 5 <sup>a</sup> | 27.28          | 228 | 270 | 325 | 368 |

<sup>a</sup>Possible Phenolic Compounds
